# Supplementary material
Source: bioRxiv or medRxiv preprint supplement (https://medrxiv.org/highwire/filestream/83428/field_highwire_adjunct_files/4/2020.05.26.20113902-5.pdf)

# Supp. Fig. 5 - Daclizumab CSF/Blood Ratios

**A**

CD56+ bright NK Cell

CD56+ bright NK Cell/CD56+ NK Cell

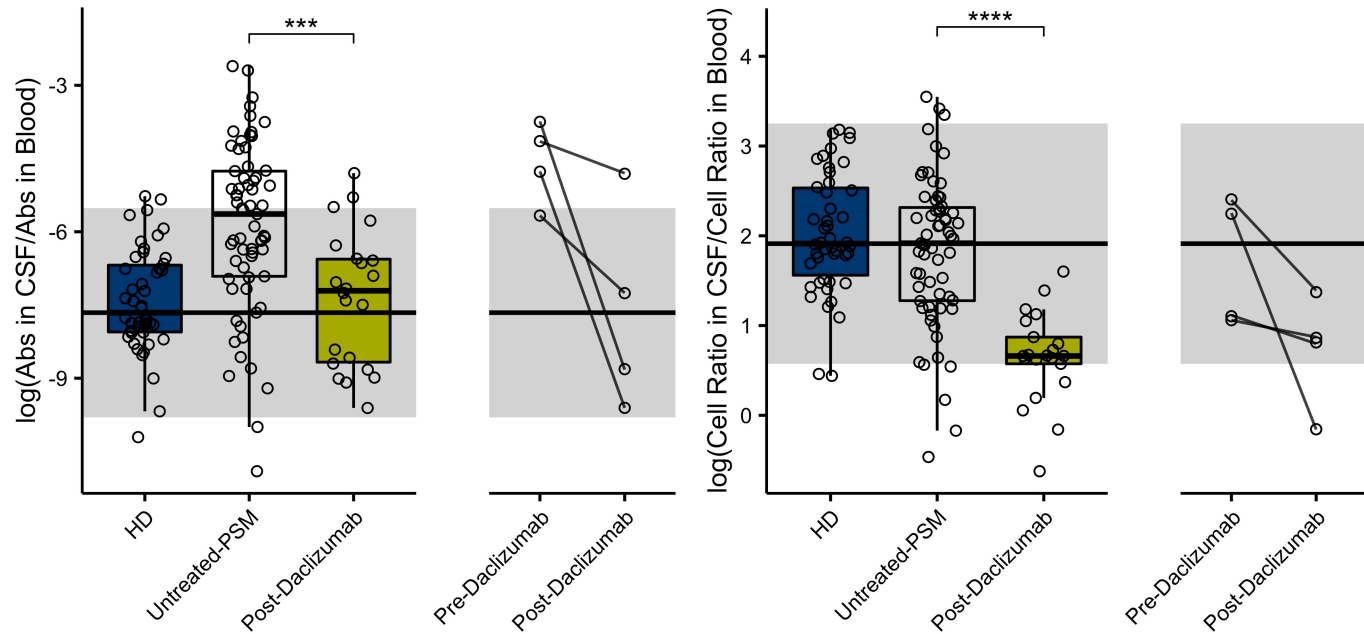

Supplement: Supplementary file [file 2020.05.26.20113902-5.pdf]
